# Supplementary material for: Selective extraction and determination of beryllium in real samples using amino-5,8-dihydroxy-1,4-naphthoquinone functionalized magnetic MIL-53 as a novel nanoadsorbent
Source: Royal Society of Chemistry journal article supplement (doi:10.1039/d0ra05408a), 2020-01-01
Supplement: d0ra05408a1.pdf [file d0ra05408a1.pdf]

## Electronic Supporting Material

### **Selective extraction and determination of beryllium in real samples using -Amino-5,8-dihydroxy-1,4-naphthoquinone functionalized magnetic MIL-53 as a novel nanoadsorbent**

Soheyla Rezabeyk<sup>1</sup>, Mahboobeh Manoochehri<sup>1,\*</sup>

*<sup>1</sup> Department of Chemistry, Central Tehran Branch, Islamic Azad University, 1467686831, Tehran, Iran*

\* Corresponding author. Tel.: +98 9127242698 Fax: +98 2188385798

E-mail address: dr.manoochehri@yahoo.com (Mahboobeh Manoochehri)

Magnetite nanoparticles were fabricated based on a previous reported method [1]. In this way, 5.2 g  $\text{FeCl}_3 \cdot 6\text{H}_2\text{O}$  and 2.0 g  $\text{FeCl}_2 \cdot 4\text{H}_2\text{O}$  were exactly weighted and then transferred to 25 mL 0.4 mol  $\text{L}^{-1}$  HCl. The mixture of iron salts solution was then added drop by drop into a 250 mL NaOH solution (1.5 mol  $\text{L}^{-1}$ ) under the nitrogen protection and heating at 80 °C during 0.5 h. Afterwards, the magnetic product was isolated from the reaction medium employing a strong magnet (15 × 12 × 5 cm, 1.4 Tesla) and then washed with double distilled water and ethanol, respectively and finally dried in a vacuum oven at 40 °C. In order to coat magnetite nanoparticles with a silica layer, 1.0 g of fabricated particles was added to a solution containing 250 mL DI water, 75 mL ethanol and 4 mL  $\text{NH}_4\text{OH}$  (28%). Thereafter, 4.5 mL TEOS was added drop by drop to the reaction mixture under vigorous stirring and stirred for 10 h at 40 °C [2]. Ultimately,  $\text{Fe}_3\text{O}_4@\text{SiO}_2$  NPs were separated by the strong magnet, washed with ethanol and then dried at room temperature [2].

[1] Asgharinezhad AA, Ebrahimzadeh H, Rezvani M, Shekari N, Loni M (2014) A novel 4-(2-pyridylazo) resorcinol functionalized magnetic nanosorbent for selective extraction of Cu(II) and Pb(II) ions from food and water samples. *Food Addit Contam* 31:1196-1204.

[2] Sadeghi S, Aboobakri E (2012) Magnetic nanoparticles with an imprinted polymer coating for the selective extraction of uranyl ions. *Microchim Acta* 178:89-97.

**Table 1S**

Experimental variables and levels of the CCD.

|               |                                 | $-\alpha$ | Lower | Level<br>Central | Upper | $+\alpha$ |
|---------------|---------------------------------|-----------|-------|------------------|-------|-----------|
| Sorption step | A: pH                           | 2.64      | 4.0   | 6.0              | 8.0   | 9.36      |
|               | B: Sorbent amount (mg)          | 13.2      | 20.0  | 30.0             | 40.0  | 47.0      |
|               | C: Sorption time (min)          | 3.3       | 5.0   | 7.5              | 10.0  | 11.7      |
| Elution step  | A: Eluent concentration (mol/L) | 0.26      | 0.4   | 0.6              | 0.8   | 0.94      |
|               | B: Eluent volume (mL)           | 0.16      | 0.5   | 1.0              | 1.5   | 1.84      |
|               | C: Elution time (min)           | 8.3       | 10.0  | 12.5             | 15.0  | 16.7      |

**Table 2S:** The tolerance limit of various ions on the determination of Be(II) ions.

| Potentially interfering ion | Tolerable concentration ratio X/Be(II) | Recovery (RSD%) |
|-----------------------------|----------------------------------------|-----------------|
| Na <sup>+</sup>             | 15000                                  | 99 ± 5          |
| K <sup>+</sup>              | 15000                                  | 101 ± 4         |
| Mg <sup>2+</sup>            | 12000                                  | 98 ± 4          |
| Ca <sup>2+</sup>            | 12000                                  | 99 ± 3          |
| Co <sup>2+</sup>            | 1000                                   | 97 ± 3.5        |
| Zn <sup>2+</sup>            | 750                                    | 97 ± 4          |
| Mn <sup>2+</sup>            | 750                                    | 98 ± 5          |
| Cu <sup>2+</sup>            | 1000                                   | 95 ± 3          |
| Fe <sup>3+</sup>            | 700                                    | 99 ± 3          |
| Pb <sup>2+</sup>            | 700                                    | 99 ± 4.5        |
| Cr <sup>3+</sup>            | 500                                    | 98 ± 2          |
| Hg <sup>2+</sup>            | 1000                                   | 96 ± 5          |
| Ni <sup>2+</sup>            | 800                                    | 95 ± 2          |
| Al <sup>3+</sup>            | 200                                    | 96 ± 3          |
| Cd <sup>2+</sup>            | 800                                    | 96 ± 3          |

Conditions: sample pH = 6.4, sample volume = 100 mL, 5µg of Be(II) ions, uptake time = 6.5 min; eluent = 1.0 mL, 0.6 mol L<sup>-1</sup> nitric acid solution, elution time = 13.5 min.

X: Concentration of diverse ions.

**Table 3S**

Comparison of the proposed method with previously reported works for speciation of beryllium.

| Method                                           | Instrument | RSD | PF <sup>a</sup> | LOD <sup>b</sup> | Ref.      |
|--------------------------------------------------|------------|-----|-----------------|------------------|-----------|
| MIL-53(Fe)/Fe <sub>3</sub> O <sub>4</sub> @ADHNQ | FAAS       | 5.8 | 350             | 0.07             | This work |
| Octadecyl silica gel-Quinalizarine               | FAAS       | 2.7 | 200             | 0.2              | [1]       |
| Octadecyl silica gel modified with aluminon      | FAAS       | <10 | 330             | 0.1              | [2]       |
| Anion exchange resin III                         | FAAS       | 1.2 | 125             | 0.045            | [3]       |

<sup>a</sup>  $\mu\text{g L}^{-1}$ .<sup>b</sup> Preconcentration factor.

## References:

1. Yamini Y, Hassan J, Mohandesi R, Bahramifar N (2002) Preconcentration of trace amounts of beryllium in water samples on octadecyl silica cartridges modified by quinalizarine and its determination with atomic absorption spectrometry. *Talanta* 56:375
2. Farahmand AR, Yousefi SR, Sheijooni Fumani N, Mirza S, Shamsipur M, Hassan J (2009) Preconcentration of beryllium via octadecyl silica gel microparticles doped with aluminum, and its determination by flame atomic absorption spectrometry. *Microchim Acta* 166:89
3. Castro MA, Robles LC, Lumbreras JM, de Celis B, Aller AJ, Littlejohn D (2009) Determination of beryllium by electrothermal atomic absorption spectrometry using tungsten surfaces and zirconium modifier. *Anal Chim Acta* 636:158.
